# Supplementary material for: High throughput SNP discovery and genotyping in grapevine (Vitis vinifera L.) by combining a re-sequencing approach and SNPlex technology
Source: PubMed Central journal article supplement (PMC2212664; doi:10.1186/1471-2164-8-424), 2007-11-19
Supplement: 1471-2164-8-424-S1.pdf [file 1471-2164-8-424-S1.pdf]

| ID  | UniGene or locus identifier | Size (bp) | forward primer                          | reverse primer                           |
|-----|-----------------------------|-----------|-----------------------------------------|------------------------------------------|
| 129 | Vvi.6889                    | 404       | TGTAACACGACGGCCAGTGGTTTCATCTCCACGATTGGA | CAGGAAACAGCTATGACCCCTTTTGAGACATTAACAGGAA |
| 131 | Vvi.3977                    | 413       | TGTAACACGACGGCCAGTGGTGGATAGTTCCTGCAAT   | CAGGAAACAGCTATGACCCGTGCTTCCGATCTTATT     |
| 133 | Vvi.3483                    | 211       | TGTAACACGACGGCCAGTAAACAAGAAACTTCGAA     | CAGGAAACAGCTATGACCTCTCATCAAGCCAACTC      |
| 135 | Vvi.3096                    | 469       | TGTAACACGACGGCCAGTCCGAGATCATGACAGAAG    | CAGGAAACAGCTATGACCTCTTATAGCCCAAGTAAG     |
| 189 | Vvi.6803                    | 227       | TGTAACACGACGGCCAGTAAAGTGGTTCATCAAAGCA   | CAGGAAACAGCTATGACCTAGCCATCACCCTTCT       |
| 191 | Vvi.552                     | 266       | TGTAACACGACGGCCAGTCAAAAGAAAGAAAGAACTTGG | CAGGAAACAGCTATGACCCGAGCAAGGAAATGAGA      |
| 195 | Vvi.3458                    | 230       | TGTAACACGACGGCCAGTTCGCCCTTACACGAGG      | CAGGAAACAGCTATGACCCATGAAATAAATCAACCAACA  |
| 197 | Vvi.10605                   | 358       | TGTAACACGACGGCCAGTATGAGATACAGGGAGGAT    | CAGGAAACAGCTATGACCCAGCTTCAATATCTGCG      |
| 205 | Vvi.8115                    | 140       | TGTAACACGACGGCCAGTGAAGACAAAGCATGGTGA    | CAGGAAACAGCTATGACCTCGGTGTAAGAAATCATAA    |
| 209 | Vvi.2857                    | 326       | TGTAACACGACGGCCAGTCACTCCACCTCACACAA     | CAGGAAACAGCTATGACCTCAGGCAAGGAAATGGAAAA   |
| 211 | Vvi.8045                    | 770       | TGTAACACGACGGCCAGTGGGCTTCTACATTTGCTACT  | CAGGAAACAGCTATGACCCGTGACGCTCTTGGCTAAAC   |
| 215 | Vvi.7907                    | 293       | TGTAACACGACGGCCAGTATCCAGGATGTCAAG       | CAGGAAACAGCTATGACCCATGAAACCAATCAAAATCCA  |
| 217 | Vvi.4330                    | 384       | TGTAACACGACGGCCAGTCACTTCACTTCTTCT       | CAGGAAACAGCTATGACCCATGAGGACTTGGACTTGGAA  |
| 219 | Vvi.8874                    | 300       | TGTAACACGACGGCCAGTCAAGCAGATAAAGGAGACA   | CAGGAAACAGCTATGACCCAAAGGTCACAAACCAACAC   |
| 221 | Vvi.2861                    | 354       | TGTAACACGACGGCCAGTCCCTCACATTTTCTGCTGCT  | CAGGAAACAGCTATGACCTCTCACTCAGCCCTCCAC     |
| 227 | Vvi.2262                    | 327       | TGTAACACGACGGCCAGTAGAGATACTGCTCGGTGAGA  | CAGGAAACAGCTATGACCTTCACTTGTCCAGGTTTTC    |
| 229 | Vvi.2364                    | 585       | TGTAACACGACGGCCAGTAGGTTACTCCAGCCACACT   | CAGGAAACAGCTATGACCCATACCCACTTCCACAGCT    |
| 239 | Vvi.1500                    | 491       | TGTAACACGACGGCCAGTGGCTCCATAAAGTAGGACTCA | CAGGAAACAGCTATGACCAAGCAAGGAAAGAAAGAA     |
| 241 | Vvi.6717                    | 494       | TGTAACACGACGGCCAGTGGCTTCTTCTTCTTCAACC   | CAGGAAACAGCTATGACCTGAGGTAGGCTGACTGATA    |
| 243 | Vvi.886                     | 370       | TGTAACACGACGGCCAGTGGAAACAAAGAAAGAACTG   | CAGGAAACAGCTATGACCAACATCAAACTGGAAA       |
| 247 | Vvi.1599                    | 322       | TGTAACACGACGGCCAGTGGCTTCTTCTTCTTCAATT   | CAGGAAACAGCTATGACCTTCCCTCTTGTGTATTGTTG   |
| 249 | CB009615                    | 382       | TGTAACACGACGGCCAGTGGTGTCTGCTTCTTCTG     | CAGGAAACAGCTATGACCTGAGAAAGAAAGAAAGAA     |
| 251 | Vvi.10077                   | 454       | TGTAACACGACGGCCAGTCCATCCACCCTCAACA      | CAGGAAACAGCTATGACCTCAAAACCAACCAACTGCT    |
| 253 | Vvi.7545                    | 500       | TGTAACACGACGGCCAGTGGCGTGTTCAGTTTC       | CAGGAAACAGCTATGACCCGATGTTGCTGTCTGCTGCT   |
| 255 | Vvi.6635                    | 303       | TGTAACACGACGGCCAGTGCATTTATGCGACCCCTAC   | CAGGAAACAGCTATGACCCGAAAGCAAGCAAGTGAAA    |
| 257 | Vvi.13149                   | 446       | TGTAACACGACGGCCAGTAAAGGAGGGATACAAAAAG   | CAGGAAACAGCTATGACCCGGCTGTGTATTACAA       |
| 259 | Vvi.1579                    | 828       | TGTAACACGACGGCCAGTTCCTCAATTCACAAACCA    | CAGGAAACAGCTATGACCCGCAAGCAGAGGATGTG      |
| 261 | Vvi.12964                   | 638       | TGTAACACGACGGCCAGTGAATCAATGGGGTAAAG     | CAGGAAACAGCTATGACCAAGGTGAAAGAAAGAACTG    |
| 267 | Vvi.11345                   | 176       | TGTAACACGACGGCCAGTAACTCAAAACATGAACAAAG  | CAGGAAACAGCTATGACCCGCTGATGGAAAGTAAAG     |
| 269 | Vvi.5068                    | 400       | TGTAACACGACGGCCAGTGGGAGCCCTTCAAAAGACA   | CAGGAAACAGCTATGACCAAAAGATGGAGGAGAAATGA   |
| 271 | Vvi.1469                    | 303       | TGTAACACGACGGCCAGTCAAGCTCTGCTGAGG       | CAGGAAACAGCTATGACCCATGTTGATCTGCTGCAAG    |
| 275 | Vvi.8909                    | 713       | TGTAACACGACGGCCAGTGGTGTTCACCCCAAGTGT    | CAGGAAACAGCTATGACCTTGTGCTGATGGTCTGCT     |
| 277 | Vvi.12240                   | 655       | TGTAACACGACGGCCAGTGGAGTCCAGCTCCATTAT    | CAGGAAACAGCTATGACCTTCTGCTTCTGCTCTT       |
| 279 | Vvi.2320                    | 362       | TGTAACACGACGGCCAGTAGTAACTCCCGCAAGATTT   | CAGGAAACAGCTATGACCTTCACTTAAATCCCACT      |
| 281 | Vvi.260                     | 374       | TGTAACACGACGGCCAGTCCCTCCATCTCACTAGCTC   | CAGGAAACAGCTATGACCCGATGGGAAGACTCGGTTT    |
| 283 | Vvi.441                     | 388       | TGTAACACGACGGCCAGTAAAGCAGGGCACTGTTTG    | CAGGAAACAGCTATGACCTGTTTATCTTGGGTTGG      |
| 285 | Vvi.587                     | 391       | TGTAACACGACGGCCAGTAGGGGCAAGGCTAAATGTC   | CAGGAAACAGCTATGACCTGGGAGTCAAAATGGAGAG    |
| 289 | Vvi.7555                    | 289       | TGTAACACGACGGCCAGTCAACAGGACAGCTTCTCCA   | CAGGAAACAGCTATGACCCGGCATGATTTGATTTTG     |
| 291 | Vvi.898                     | 323       | TGTAACACGACGGCCAGTGGATTCCTGCGAGTATTTC   | CAGGAAACAGCTATGACCCAAATCAAGAAATCTTAAACCT |
| 293 | Vvi.6885                    | 194       | TGTAACACGACGGCCAGTGGATCAACCCATTTGAAGA   | CAGGAAACAGCTATGACCCCTTATCATCGCTTTGCT     |
| 297 | Vvi.7130                    | 303       | TGTAACACGACGGCCAGTCAAGCTCTGCTGAGG       | CAGGAAACAGCTATGACCCATGCTGCTGCTGCTG       |
| 305 | Vvi.2940                    | 259       | TGTAACACGACGGCCAGTGGGCAACCTCGGACTACT    | CAGGAAACAGCTATGACCCAGCCCTGCTGATGTCTG     |
| 311 | Vvi.5548                    | 373       | TGTAACACGACGGCCAGTAGCCATTAACCTTCTTCT    | CAGGAAACAGCTATGACCCGTTGAGAGGACTGATA      |
| 317 | Vvi.6697                    | 296       | TGTAACACGACGGCCAGTCACTTCTTCCACCCAC      | CAGGAAACAGCTATGACCTAGCCTCAATCTGCTGAGC    |
| 325 | Vvi.7482                    | 228       | TGTAACACGACGGCCAGTACAAACCAACCAAGAAAG    | CAGGAAACAGCTATGACCAAAAGATGCTCCCTCCA      |
| 329 | Vvi.7885                    | 323       | TGTAACACGACGGCCAGTCAAGCCCTCAACCACTGAC   | CAGGAAACAGCTATGACCCGAAATCAATCGCTTCAA     |
| 331 | Vvi.7941                    | 443       | TGTAACACGACGGCCAGTGGGATTTGGTTTGTGTA     | CAGGAAACAGCTATGACCCATGTTGATTTGGTGTGCT    |
| 337 | Vvi.14385                   | 425       | TGTAACACGACGGCCAGTGGGCAAGCCTTATACCTCTC  | CAGGAAACAGCTATGACCCCTCTTCTCTTCTTCCA      |
| 341 | Vvi.1552                    | 367       | TGTAACACGACGGCCAGTCCCATCACTCAACATCA     | CAGGAAACAGCTATGACCCGCAATAAAGGGGAACAGA    |
| 345 | Vvi.7060                    | 590       | TGTAACACGACGGCCAGTCAATGAATCTGGGATGAAGT  | CAGGAAACAGCTATGACCTTCTTCTTCTTCTGATGTTG   |
| 347 | Vvi.3139                    | 312       | TGTAACACGACGGCCAGTCACTCACTCTTAAAGCA     | CAGGAAACAGCTATGACCCATGCTCTCTGATTC        |
| 351 | Vvi.4518                    | 372       | TGTAACACGACGGCCAGTAGAGAGCTTCAAGCAATG    | CAGGAAACAGCTATGACCCGACTTCTCCACTCAGC      |
| 355 | Vvi.8874                    | 437       | TGTAACACGACGGCCAGTGTTCATCCCTGCTTTTA     | CAGGAAACAGCTATGACCAACGCTTACTCCACCACT     |
| 357 | Vvi.8065                    | 405       | TGTAACACGACGGCCAGTAGGAGGAGGCAAGAAAG     | CAGGAAACAGCTATGACCTGAACACTGCAACCACT      |
| 363 | Vvi.1275                    | 399       | TGTAACACGACGGCCAGTCAAGCCCAAAATCCATA     | CAGGAAACAGCTATGACCTCAGGGTAGGCGTATTCTC    |
| 365 | Vvi.1283                    | 311       | TGTAACACGACGGCCAGTGGAGGACTTCTATCGAAA    | CAGGAAACAGCTATGACCCGCACTTCCACACTCTTG     |
| 369 | Vvi.1745                    | 398       | TGTAACACGACGGCCAGTGAAGCAAACTTCGCACT     | CAGGAAACAGCTATGACCCCTTGGAAAGAGGTTTGG     |
| 377 | Vvi.7795                    | 361       | TGTAACACGACGGCCAGTGGGCAAACTTCCATTC      | CAGGAAACAGCTATGACCCGCAAGGGAAGAAATCTGG    |
| 381 | Vvi.1025                    | 119       | TGTAACACGACGGCCAGTCCAGCAAAAGAAAGTGA     | CAGGAAACAGCTATGACCTCAGGGAAGTACAAAAGG     |
| 385 | Vvi.1124                    | 374       | TGTAACACGACGGCCAGTGTACCAAGGAGGAAAG      | CAGGAAACAGCTATGACCCAAAGATGGAGGATTTGT     |
| 391 | Vvi.7369                    | 212       | TGTAACACGACGGCCAGTCACTCTCACTCTCC        | CAGGAAACAGCTATGACCCATCCCAACCAAGGACTG     |
| 397 | Vvi.8638                    | 358       | TGTAACACGACGGCCAGTCTCAACCCCTGACTCC      | CAGGAAACAGCTATGACCCCTCTCTCCCTCATTT       |
| 401 | Vvi.6643                    | 542       | TGTAACACGACGGCCAGTGTGGAGATGAGTGCTG      | CAGGAAACAGCTATGACCATGTTGTGGTCTTCTCT      |
| 403 | Vvi.251                     | 304       | TGTAACACGACGGCCAGTCAAGCACCTTCACTGCTT    | CAGGAAACAGCTATGACCTCAATCTCCGACTCTCA      |
| 405 | Vvi.6924                    | 383       | TGTAACACGACGGCCAGTGAATGCCACAGACCCTC     | CAGGAAACAGCTATGACCAACAATGACAGGCAACAG     |
| 413 | Vvi.7386                    | 230       | TGTAACACGACGGCCAGTGTCTTGTGCGTCTC        | CAGGAAACAGCTATGACCCAAATGATCTGGTGTGCT     |
| 415 | Vvi.1621                    | 346       | TGTAACACGACGGCCAGTCTTGTATCCAGCAG        | CAGGAAACAGCTATGACCAAGGAGACTGAGATGATG     |
| 421 | Vvi.6670                    | 378       | TGTAACACGACGGCCAGTGGCTTGTCTCCCAACT      | CAGGAAACAGCTATGACCTTCCCAAACTCCGCTGTC     |
| 425 | Vvi.1402                    | 587       | TGTAACACGACGGCCAGTGTATGCTCTCTGCTGTT     | CAGGAAACAGCTATGACCCGCTGCTCTCTTCTTCT      |
| 427 | Vvi.8056                    | 702       | TGTAACACGACGGCCAGTCAAGGAGGAGGACTTCC     | CAGGAAACAGCTATGACCCATGAGGAGGAGGACTTCC    |
| 429 | Vvi.2290                    | 611       | TGTAACACGACGGCCAGTAAACAAGCAACCTCATCG    | CAGGAAACAGCTATGACCCATGAGACTTCTGGCTGCT    |
| 437 | Vvi.2378                    | 326       | TGTAACACGACGGCCAGTCCGATGAGACAGAGTGA     | CAGGAAACAGCTATGACCTCCAGTTTCCAGCAGGAG     |
| 445 | Vvi.7534                    | 439       | TGTAACACGACGGCCAGTCTCCAGAGAGCAATCGTGT   | CAGGAAACAGCTATGACCCGGCATCTTCTTCTTCT      |
| 447 | Vvi.157                     | 329       | TGTAACACGACGGCCAGTGTTCATTCATTCATTA      | CAGGAAACAGCTATGACCCAAAGGCTGTTACTCTTA     |
| 451 | Vvi.6895                    | 373       | TGTAACACGACGGCCAGTAACTCAGAGAGCAATTTCC   | CAGGAAACAGCTATGACCCACTTATCTACCCGCTCA     |
| 453 | Vvi.9104                    | 396       | TGTAACACGACGGCCAGTAAACAAGCAACACTTGG     | CAGGAAACAGCTATGACCAACAAGCTTAAACAGGTTG    |
| 455 | Vvi.7590                    | 316       | TGTAACACGACGGCCAGTGGGAACTCTCGCATTTGT    | CAGGAAACAGCTATGACCAAGGGAATAGCAAGGCTG     |
| 459 | Vvi.7313                    | 422       | TGTAACACGACGGCCAGTAAACAAGCAAGTAAAGTTC   | CAGGAAACAGCTATGACCCGAAATCAAAAGCCAGT      |
| 463 | Vvi.7215                    | 429       | TGTAACACGACGGCCAGTGTGCTCACTGCTGCTGAT    | CAGGAAACAGCTATGACCTTGTGAGTCTGCTTCCAA     |
| 467 | Vvi.7805                    | 688       | TGTAACACGACGGCCAGTGTGCTGAGCAGTGAAG      | CAGGAAACAGCTATGACCCAAAGCAAGCTTCAAGT      |
| 469 | Vvi.12905                   | 344       | TGTAACACGACGGCCAGTCTTCACTCTTCACTTCT     | CAGGAAACAGCTATGACCCACTTCTTGGCAACAAG      |
| 471 | Vvi.6786                    | 372       | TGTAACACGACGGCCAGTCAACCTTCCCAAGATA      | CAGGAAACAGCTATGACCTCAATAGCCTCAACCTCC     |
| 473 | Vvi.6622                    | 426       | TGTAACACGACGGCCAGTCCACCACTTCTTCTCAC     | CAGGAAACAGCTATGACCCGACCACTTCCCTTCTCA     |
| 475 | Vvi.6934                    | 332       | TGTAACACGACGGCCAGTAACTGCAATGCAATCAAC    | CAGGAAACAGCTATGACCCGCAAGCAATCAATCAAA     |
| 479 | Vvi.6846                    | 430       | TGTAACACGACGGCCAGTCCGACTTCTGCTTCAAC     | CAGGAAACAGCTATGACCTGTTTCCCACTTCACTCC     |
| 487 | Vvi.1510                    | 276       | TGTAACACGACGGCCAGTATATCCCAAGAACCTAGC    | CAGGAAACAGCTATGACCATTCCCAAGAGGAGGAC      |
| 497 | Vvi.7873                    | 448       | TGTAACACGACGGCCAGTGTGTGTGATGAGCTTG      | CAGGAAACAGCTATGACCCCAACCTCTGCTTCTGCT     |
| 503 | Vvi.2656                    | 429       | TGTAACACGACGGCCAGTCAACACTGGGCAAGGAAA    | CAGGAAACAGCTATGACCCGCTGAGGTGGGTTTGTG     |
| 517 | Vvi.6799                    | 381       | TGTAACACGACGGCCAGTGGAGCAACAAATGCAACA    | CAGGAAACAGCTATGACCCGCACTCTGCTGCTGAG      |
| 519 | Vvi.6501                    | 383       | TGTAACACGACGGCCAGTGTGCTGAGCAGTGAAG      | CAGGAAACAGCTATGACCCAAAGCAAGCTTCAAGT      |
| 523 | Vvi.7561                    | 395       | TGTAACACGACGGCCAGTAAAGTCAAGCTGGAGTAA    | CAGGAAACAGCTATGACCCGCTGCTCTTATCTGCG      |
| 527 | Vvi.7374                    | 352       | TGTAACACGACGGCCAGTGTGATGAGGAGTGTG       | CAGGAAACAGCTATGACCTTCTGCTCACTGCTCTC      |
| 533 | Vvi.1828                    | 255       | TGTAACACGACGGCCAGTGGACATCAAGCAACCAACA   | CAGGAAACAGCTATGACCCGCAAGAAAGAGCTAAG      |
| 537 | Vvi.6790                    | 505       | TGTAACACGACGGCCAGTGGCTGAGGAAAGTGAATG    | CAGGAAACAGCTATGACCCATGCTCGGCTAAGAGACT    |
| 543 | Vvi.8117                    | 459       | TGTAACACGACGGCCAGTCAACAAGAACCCGCCATTA   | CAGGAAACAGCTATGACCCATCAGGCGCTATGTTCAA    |
| 551 | Vvi.5062                    | 535       | TGTAACACGACGGCCAGTCACTTCTTCCGCTCAGTGG   | CAGGAAACAGCTATGACCAACAAGTGGGTTGAG        |
| 553 | Vvi.2453                    | 361       | TGTAACACGACGGCCAGTCTTCCACTAGGCTACGA     | CAGGAAACAGCTATGACCCAACTAAGCACCACCACA     |
| 555 | Vvi.1163                    | 453       | TGTAACACGACGGCCAGTGGCTCCAGTGTCTTCTACC   | CAGGAAACAGCTATGACCCATTAACCACTGGGCAAGT    |
| 557 | Vvi.7811                    | 405       | TGTAACACGACGGCCAGTGGCTGAACAAGGCCAACA    | CAGGAAACAGCTATGACCCGCTGAGGCTATCCACTG     |
| 559 | Vvi.1222                    | 254       | TGTAACACGACGGCCAGTTACGCCCTTGTCTTGTGA    | CAGGAAACAGCTATGACCCGCTGATGATCTGCTGCT     |
| 561 | Vvi.12074                   | 279       | TGTAACACGACGGCCAGTAGGAGGACTTGCATCAAGA   | CAGGAAACAGCTATGACCCGAGCACCATAAAGGCAAA    |
| 565 | Vvi.3208                    | 309       | TGTAACACGACGGCCAGTGCATATGCCAGCAAAAGC    | CAGGAAACAGCTATGACCCGAAACTTGGAGAAAGACA    |
| 567 | Vvi.7830                    | 459       | TGTAACACGACGGCCAGTCTTCTTCCGCTTCTTCTG    | CAGGAAACAGCTATGACCCGTTTGTGATCTTCTTCT     |
| 569 | Vvi.7646                    | 375       | TGTAACACGACGGCCAGTAACTCAACCTCCCAACAC    | CAGGAAACAGCTATGACCCCTTCTGCGCTGTGCTACT    |
| 571 | Vvi.11189                   | 371       | TGTAACACGACGGCCAGTCAACATACACAGATCGACAA  | CAGGAAACAGCTATGACCCCAATCTGGGAAACTCA      |
| 573 | Vvi.4522                    | 302       | TGTAACACGACGGCCAGTCTCCCTCAACAATGAGC     | CAGGAAACAGCTATGACCCAAATCAAGGAACTACAG     |
| 575 | Vvi.6640                    | 270       | TGTAACACGACGGCCAGTCTGGATCTGTATGTTGA     | CAGGAAACAGCTATGACCTGGTGAAGAACTTGGTATG    |
| 579 | Vvi.3568                    | 300       | TGTAACACGACGGCCAGTGTGTTGGGAAGTGTGCTG    | CAGGAAACAGCTATGACCCGATGGAGTAGCCTATGCT    |
| 581 | Vvi.7828                    | 350       | TGTAACACGACGGCCAGTCAACCCATGAGGCTCCAAA   | CAGGAAACAGCTATGACCCGCTGTTGAGTCTCCAA      |
| 591 | Vvi.9089                    | 391       | TGTAACACGACGGCCAGTCAAGCTGATGATGAGTGT    | CAGGAAACAGCTATGACCCGAAAGCTTCCGCAAG       |
| 593 | Vvi.6936                    | 343       | TGTAACACGACGGCCAGTGGATGTGCTTAAGATG      | CAGGAAACAGCTATGACCATGATGCTCTTAAGATGCT    |
| 595 | Vvi.12406                   | 364       | TGTAACACGACGGCCAGTGTCTTCCAGCTCTCTTCA    | CAGGAAACAGCTATGACCTGCAATGATGCTTCTTCA     |
| 599 | Vvi.15592                   | 511       | TGTAACACGACGGCCAGTGGCCAAAGAAAGGAGA      | CAGGAAACAGCTATGACCCCAACCAACTGACCTCCCA    |
| 603 | Vvi.8069                    | 422       | TGTAACACGACGGCCAGTCTTCTGCTTCACTCAAGT    | CAGGAAACAGCTATGACCCCTTCTTCAATTCACCA      |
| 605 | Vvi.7461                    | 319       | TGTAACACGACGGCCAGTCTTCTGGGCTGATGTT      | CAGGAAACAGCTATGACCCCTTCTGCTCTCTCT        |
| 613 | Vvi.7462                    | 390       | TGTAACACGACGGCCAGTCTGACACAACCTCACGAA    | CAGGAAACAGCTATGACCCGCTGACCTCTCTTCAA      |
| 621 | Vvi.3373                    | 410       | TGTAACACGACGGCCAGTGGAAACATCCCAATAA      | CAGGAAACAGCTATGACCCCTCATGCTTGTGATTT      |
| 625 | Vvi.6997                    | 350       | TGTAACACGACGGCCAGTCTGGACCTCAGCTGTGTT    | CAGGAAACAGCTATGACCTTCACTGCTTCTCTTCA      |
| 631 | CB002658                    | 395       | TGTAACACGACGGCCAGTGTATGAGGCTGATGCTC     | CAGGAAACAGCTATGACCCGCTGTTGAGTCTGACTG     |
| 633 | Vvi.7376                    | 381       | TGTAACACGACGGCCAGTCAAGCTGCTCAAAATTA     | CAGGAAACAGCTATGACCCGCTGCTGCTGCTGCT       |
| 635 | Vvi.738                     | 444       | TGTAACACGACGGCCAGTCTTCTTCCGCTTCTTACA    | CAGGAAACAGCTATGACCAAAAGAGCCAAACCAAC      |
| 643 | Vvi.10410                   | 460       | TGTAACACGACGGCCAGTGAATATGCCATGCTTCT     | CAGGAAACAGCTATGACCAAGTGTGCTTCAAGTACAG    |
| 649 | Vvi.8076                    | 755       | TGTAACACGACGGCCAGTGTGATGCTCTGTGTTGA     | CAGGAAACAGCTATGACCTTCTTATGCCGCTTCTG      |
| 651 | Vvi.6647                    | 658       | TGTAACACGACGGCCAGTCAACCAAGCAAGCACCC     | CAGGAAACAGCTATGACCAACTGATGCTAGGCTCTAAA   |
| 653 | Vvi.316                     | 406       | TGTAACACGACGGCCAGTCAATGAAGCAACTCACCA    | CAGGAAACAGCTATGACCATTCTTCAATGACCAAC      |
| 655 | Vvi.6780                    | 366       | TGTAACACGACGGCCAGTGTGAAGCAAGGTTCCACA    | CAGGAAACAGCTATGACCCAAAGCCGCTCAAGACTG     |
| 659 | CB970655                    | 733       | TGTAACACGACGGCCAGTGTGAGCAGGAGGTTGAATA   | CAGGAAACAGCTATGACCCGACTACAAAGAAACA       |
| 663 | Vvi.7589                    | 681       | TGTAACACGACGGCCAGTGGTGGTAGGATGAGAA      | CAGGAAACAGCTATGACCTGGGCAAGTAAAGCAGCT     |

| ID   | UniGene or locus identifier | Size (bp) | forward primer                               | reverse primer                          |
|------|-----------------------------|-----------|----------------------------------------------|-----------------------------------------|
| 677  | Vvi.5315                    | 611       | TGTAAGACGACGGCCAGTCCCTCTACAAGATTGGGGATA      | CAGGAAACAGCTATGACCAGATGTTGACCCAGTAAAGC  |
| 683  | Vvi.7884                    | 302       | TGTAAGACGACGGCCAGTCCGCTTGAACCGCTCT           | CAGGAAACAGCTATGACCAGTGGTTCGCGCTTTTCG    |
| 689  | Vvi.5832                    | 338       | TGTAAGACGACGGCCAGTGGAAAGCTCTAGCATTGG         | CAGGAAACAGCTATGACCTATTATGGCTTGGCCCTTT   |
| 691  | Vvi.4484                    | 446       | TGTAAGACGACGGCCAGTCCGCAAGAACATAAAGAGCA       | CAGGAAACAGCTATGACCCAGGACGAGGAGCCATTCA   |
| 697  | Vvi.1323                    | 398       | TGTAAGACGACGGCCAGTGAAGCATTGCCAAGAGAGCC       | CAGGAAACAGCTATGACCCAGGCAACCCGTAGCAATCC  |
| 699  | Vvi.7621                    | 423       | TGTAAGACGACGGCCAGTGAATGGTGTAAAGAACCTC        | CAGGAAACAGCTATGACCCAGTCTGCTCACTCACTC    |
| 701  | Vvi.8086                    | 475       | TGTAAGACGACGGCCAGTGTAGTGTGAGCGAGTTTG         | CAGGAAACAGCTATGACCCCTTATGTTCTTCCAGCA    |
| 705  | Vvi.7405                    | 290       | TGTAAGACGACGGCCAGTCTAGTGACCATCCAGAG          | CAGGAAACAGCTATGACCCACCAACCTCTTCTCATCC   |
| 709  | Vvi.4581                    | 476       | TGTAAGACGACGGCCAGTTCAGCGGTCACTCCTCAGTC       | CAGGAAACAGCTATGACCCAGTCCGAGTCTCTTCTTCC  |
| 713  | Vvi.7970                    | 1758      | TGTAAGACGACGGCCAGTGGAGAGTTAAGGAAGCAG         | CAGGAAACAGCTATGACCCCTGCTTGTGATCCTTT     |
| 715  | Vvi.1493                    | 331       | TGTAAGACGACGGCCAGTTCACCTTGAAGGCCATACC        | CAGGAAACAGCTATGACCCATGTCGCGCTTGTGTGCT   |
| 729  | Vvi.8105                    | 387       | TGTAAGACGACGGCCAGTAAAGCAGGATGCAAAAGC         | CAGGAAACAGCTATGACCCAGTGGTGTGCTGAGAGT    |
| 733  | Vvi.1569                    | 252       | TGTAAGACGACGGCCAGTCCCAAAATGGATTA             | CAGGAAACAGCTATGACCCGAGCACAACCTCCAGT     |
| 741  | Vvi.1527                    | 309       | TGTAAGACGACGGCCAGTCTTGTCTGTTCATCTC           | CAGGAAACAGCTATGACCTCACAGAAATGAAACTGAAG  |
| 745  | Vvi.6724                    | 377       | TGTAAGACGACGGCCAGTGGAGTTGGAGTTGTGTGG         | CAGGAAACAGCTATGACCCGTGTGGTGGAGTGGTGG    |
| 751  | Vvi.133                     | 419       | TGTAAGACGACGGCCAGTACATTCAGGACGACAGAT         | CAGGAAACAGCTATGACCCGATCAAGTTACAGGTG     |
| 753  | AF378127                    | 1686      | TGTAAGACGACGGCCAGTCCAGTCCACAGCGCTC           | CAGGAAACAGCTATGACCCGTGACCTGGGAGTCCG     |
| 759  | Vvi.824                     | 934       | TGTAAGACGACGGCCAGTGTAGACCAACACAGCAGC         | CAGGAAACAGCTATGACCCGTTAATCGCTCGTCTTC    |
| 765  | CV093472                    | 1476      | TGTAAGACGACGGCCAGTGGATATACTTGGAGGTTACACTATGC | CAGGAAACAGCTATGACCCGTGTGTGTTCTTCCATGAC  |
| 775  | AMA34138                    | 1686      | TGTAAGACGACGGCCAGTTCACCTGGAGGGAGAACT         | CAGGAAACAGCTATGACCTCCAGCAAAATACAAATCCCT |
| 781  | Vvi.2405                    | 1089      | TGTAAGACGACGGCCAGTGCAGGCTTTGGCCTTGT          | CAGGAAACAGCTATGACCCATTACAGGAGAAACACCA   |
| 787  | Vvi.11892                   | 1117      | TGTAAGACGACGGCCAGTAAAGCAGGATGCAAAAGC         | CAGGAAACAGCTATGACCCAGTGGTGTGCTGAGAGT    |
| 799  | Vvi.129                     | 537       | TGTAAGACGACGGCCAGTCTCATCTGCCTATGTGGT         | CAGGAAACAGCTATGACCTAACTAATGTGGTGGCAGT   |
| 801  | Vvi.13738                   | 490       | TGTAAGACGACGGCCAGTACTTCAACTGCTCTTTGC         | CAGGAAACAGCTATGACCTTGTGTTCAAGCGTAGTG    |
| 811  | Vvi.128                     | 465       | TGTAAGACGACGGCCAGTAGACTGGATCAGCCTTCAA        | CAGGAAACAGCTATGACCAAGCAGGAGGAGTGACAA    |
| 815  | Vvi.8863                    | 418       | TGTAAGACGACGGCCAGTCACTTCAATTCCTTCTTCC        | CAGGAAACAGCTATGACCCGCTTGTCTTCACTTCTCC   |
| 817  | Vvi.1581                    | 437       | TGTAAGACGACGGCCAGTCTGATCAATGTAGAGCAGCA       | CAGGAAACAGCTATGACCCGTGCAAGAAAGGAAGTTG   |
| 819  | Vvi.1591                    | 372       | TGTAAGACGACGGCCAGTGCAAAAGTGCAGAGGGAGTT       | CAGGAAACAGCTATGACCTGATGAAAGGGAGGAGTGA   |
| 825  | Vvi.1560                    | 359       | TGTAAGACGACGGCCAGTTCAGGTTTCAGGTTGGAGGAC      | CAGGAAACAGCTATGACCCATTGGGAAGGCCATGACC   |
| 827  | Vvi.14739                   | 247       | TGTAAGACGACGGCCAGTCACTGTTGCTTGTGGT           | CAGGAAACAGCTATGACCCATTAGCCAAACACCTTTTCG |
| 829  | Vvi.1206                    | 373       | TGTAAGACGACGGCCAGTAGACGGAGAGGAAAGCA          | CAGGAAACAGCTATGACCCCTGAACCCAGAAAGTCAAG  |
| 835  | Vvi.10423                   | 275       | TGTAAGACGACGGCCAGTTCCTCAATCATGATAGT          | CAGGAAACAGCTATGACCCGTGAATTTGCTTTCATGG   |
| 837  | Vvi.1551                    | 340       | TGTAAGACGACGGCCAGTACACACCCAAATCCACAT         | CAGGAAACAGCTATGACCCCTACGCTTCACTGACG     |
| 841  | Vvi.8949                    | 443       | TGTAAGACGACGGCCAGTCAACCCAAATCCCAAAAT         | CAGGAAACAGCTATGACCCGAGCAGACAGGATGAGA    |
| 843  | Vvi.398                     | 417       | TGTAAGACGACGGCCAGTCTCCTGCGCCATAA             | CAGGAAACAGCTATGACCCGTGACCCAGCATTTGACCTC |
| 845  | Vvi.8153                    | 876       | TGTAAGACGACGGCCAGTTCACACAGCAGGATCTTC         | CAGGAAACAGCTATGACCCATCCCAACGAAAGGAT     |
| 851  | Vvi.1191                    | 348       | TGTAAGACGACGGCCAGTCCACAGTTTGTCTGCTTC         | CAGGAAACAGCTATGACCCATGTGCTAGGAAGTGTAA   |
| 853  | Vvi.8888                    | 346       | TGTAAGACGACGGCCAGTGCAGGACATGGCTTATAT         | CAGGAAACAGCTATGACCAATACACCCCTGAATGGAC   |
| 855  | Vvi.7925                    | 202       | TGTAAGACGACGGCCAGTACCCTGTCCACCCAGCAAC        | CAGGAAACAGCTATGACCCCTGCGATCAAGATCAATG   |
| 857  | Vvi.6159                    | 436       | TGTAAGACGACGGCCAGTTGAGGAGCCATAGACACTC        | CAGGAAACAGCTATGACCAAGGGGACTAAGAAATACA   |
| 859  | Vvi.7639                    | 398       | TGTAAGACGACGGCCAGTCTCAGACTGCTCAGT            | CAGGAAACAGCTATGACCCCTGACCCCTGACACTC     |
| 865  | Vvi.2316                    | 557       | TGTAAGACGACGGCCAGTGTGATGTTGTTATCG            | CAGGAAACAGCTATGACCCCTGTACTGCTGTGCTTTC   |
| 867  | Vvi.9994                    | 778       | TGTAAGACGACGGCCAGTGAAGTAGTGGTGGAGTTGA        | CAGGAAACAGCTATGACCTTGGGCTAATGATGAAGT    |
| 871  | Vvi.6728                    | 376       | TGTAAGACGACGGCCAGTCTCACTGGTTCAGTCACAT        | CAGGAAACAGCTATGACCCCTACCGGCTTCACTGACT   |
| 873  | Vvi.9410                    | 435       | TGTAAGACGACGGCCAGTCCGAATGAGGCGACGAAGA        | CAGGAAACAGCTATGACCAATTTCCACCCCAAGG      |
| 875  | Vvi.1711                    | 359       | TGTAAGACGACGGCCAGTCAAGCCTTGAAGAGTGTCT        | CAGGAAACAGCTATGACCAAGCTGCTGATGATAGCC    |
| 877  | Vvi.7410                    | 427       | TGTAAGACGACGGCCAGTGGAGTCAATGGCAACAGAA        | CAGGAAACAGCTATGACCTGGATTGGTAGCTGCTAGC   |
| 879  | Vvi.9151                    | 378       | TGTAAGACGACGGCCAGTGCAAAAGTGCAGATACCAAC       | CAGGAAACAGCTATGACCCGCGACCTGAAACCTTC     |
| 881  | Vvi.7982                    | 487       | TGTAAGACGACGGCCAGTCAAGCAACCAAGTACATAA        | CAGGAAACAGCTATGACCAAGTGTGCAAAATCAAGG    |
| 883  | Vvi.9204                    | 691       | TGTAAGACGACGGCCAGTCTCTTGGCTATTCTT            | CAGGAAACAGCTATGACCCATTCCAGCTGCTGCTCTT   |
| 887  | Vvi.2222                    | 323       | TGTAAGACGACGGCCAGTCTGCTGTGCTTCTC             | CAGGAAACAGCTATGACCCAAATCATCCAGCACCTC    |
| 891  | Vvi.5254                    | 317       | TGTAAGACGACGGCCAGTCTCAGCAGTCAAGAAAT          | CAGGAAACAGCTATGACCAATTCATCAGCAGCCACA    |
| 893  | Vvi.7958                    | 578       | TGTAAGACGACGGCCAGTGAAGTAGTGGTGGAGTTGA        | CAGGAAACAGCTATGACCCCTTCAAGCCTAGATTTG    |
| 895  | Vvi.6840                    | 423       | TGTAAGACGACGGCCAGTGTGCAACAGAAACAGAGCTT       | CAGGAAACAGCTATGACCAAAAGCACTGGCAAACTT    |
| 897  | Vvi.893                     | 422       | TGTAAGACGACGGCCAGTGCAGAGTTGTGGAT             | CAGGAAACAGCTATGACCCGAGTTCCTCACTCACGA    |
| 907  | Vvi.7571                    | 443       | TGTAAGACGACGGCCAGTAAAGCAGCAAGGAAAGG          | CAGGAAACAGCTATGACCAATACAGTAGGCAAGGAA    |
| 915  | Vvi.7389                    | 438       | TGTAAGACGACGGCCAGTCCAAAGTGCACACACCAAG        | CAGGAAACAGCTATGACCAATACCCCGCTGATGCTG    |
| 919  | Vvi.4117                    | 470       | TGTAAGACGACGGCCAGTGGAAATGGTGCAGAAAGT         | CAGGAAACAGCTATGACCCCACTGACCTGCTGCTT     |
| 923  | Vvi.6727                    | 371       | TGTAAGACGACGGCCAGTCCGCAACCAATAGCTTTC         | CAGGAAACAGCTATGACCCCACTGGCTGCTGCTGCTT   |
| 925  | Vvi.10211                   | 363       | TGTAAGACGACGGCCAGTCTCTCTCTCCACCAAGAA         | CAGGAAACAGCTATGACCCGAAAGATCTGTGATGACAT  |
| 929  | Vvi.10340                   | 329       | TGTAAGACGACGGCCAGTCTCTCTCTCTCTCTTTC          | CAGGAAACAGCTATGACCCGATCTCCCTGCTGCTTTC   |
| 933  | Vvi.1699                    | 542       | TGTAAGACGACGGCCAGTTGAAGGAAACAGGAGGAA         | CAGGAAACAGCTATGACCCGCTTCAAGCCTTTG       |
| 941  | Vvi.7707                    | 480       | TGTAAGACGACGGCCAGTGTATGGACGTGTATGTGA         | CAGGAAACAGCTATGACCAAGGAGCCAAAGACATA     |
| 945  | CF215168                    | 355       | TGTAAGACGACGGCCAGTGGTTCGCTGGATTGATTA         | CAGGAAACAGCTATGACCCGCTTGCCACACTGAAA     |
| 947  | Vvi.7240                    | 345       | TGTAAGACGACGGCCAGTAGGAGGCGAAGCAGAGA          | CAGGAAACAGCTATGACCCCTTACCAATTCATATGAC   |
| 961  | Vvi.2190                    | 299       | TGTAAGACGACGGCCAGTGCAGCAGAACTGAAGCA          | CAGGAAACAGCTATGACCCGCTCAAAATATATCCA     |
| 967  | Vvi.3288                    | 341       | TGTAAGACGACGGCCAGTGAAGCATGACGAAAGCACA        | CAGGAAACAGCTATGACCCGATTTCCGAGTCAAGCAG   |
| 969  | Vvi.6678                    | 175       | TGTAAGACGACGGCCAGTATCATCTGCAACTTCCAC         | CAGGAAACAGCTATGACCCCACTTCAACATCAAGG     |
| 973  | Vvi.10243                   | 388       | TGTAAGACGACGGCCAGTCACTATCACACAGCAGGAACC      | CAGGAAACAGCTATGACCAAGGCTCATCGGAAAGTCT   |
| 977  | Vvi.7332                    | 420       | TGTAAGACGACGGCCAGTAGGAGGAGCAACCAAGCAT        | CAGGAAACAGCTATGACCCGAGGAAACAGCAGCACA    |
| 987  | Vvi.10197                   | 361       | TGTAAGACGACGGCCAGTGAATGCAAGCAGGAGAT          | CAGGAAACAGCTATGACCTTAAACCAACAGCAGCACA   |
| 1001 | Vvi.7740                    | 434       | TGTAAGACGACGGCCAGTGGAAATGCAAGGACAGGAAAC      | CAGGAAACAGCTATGACCCACCAAGAGTCTTCCA      |
| 1003 | Vvi.1292                    | 500       | TGTAAGACGACGGCCAGTCCAAAGTTTCTTGGGCAAT        | CAGGAAACAGCTATGACCCAGAGGTTGTGAGGAGCTGA  |
| 1007 | Vvi.11667                   | 585       | TGTAAGACGACGGCCAGTGAACGACCAAGATGAAACCC       | CAGGAAACAGCTATGACCCGAGCTTATGACGAAAGG    |
| 1009 | Vvi.12361                   | 421       | TGTAAGACGACGGCCAGTCACTGCGCCAGTTGATG          | CAGGAAACAGCTATGACCTGGGAGTGAATGAAAGG     |
| 1011 | Vvi.3190                    | 538       | TGTAAGACGACGGCCAGTCTTGTGCTATCCGTTCTC         | CAGGAAACAGCTATGACCCAGCTTCTCAACTCTCA     |
| 1015 | Vvi.8123                    | 333       | TGTAAGACGACGGCCAGTGCAAAAGTGCAGCAGCAAGA       | CAGGAAACAGCTATGACCCGAGTGGTAAAGGAGTGT    |
| 1017 | Vvi.668                     | 304       | TGTAAGACGACGGCCAGTGTGCAAGCAGATGCACATAG       | CAGGAAACAGCTATGACCAAGGAGTGGTGTAAAGAGG   |
| 1021 | Vvi.7575                    | 218       | TGTAAGACGACGGCCAGTAAACTGAACAGATGAGTGC        | CAGGAAACAGCTATGACCCGCGGATTTGAGAAAGGAA   |
| 1023 | Vvi.41                      | 487       | TGTAAGACGACGGCCAGTCCCACTCAACCAAGAGTGA        | CAGGAAACAGCTATGACCTACTCTGACAGCTGCACA    |
| 1025 | Vvi.7021                    | 444       | TGTAAGACGACGGCCAGTAAACAGCAGCAACAGAGC         | CAGGAAACAGCTATGACCTGTCAACTCTCTGCGAAA    |
| 1027 | Vvi.5643                    | 628       | TGTAAGACGACGGCCAGTAGGCAACCAACCAACTTC         | CAGGAAACAGCTATGACCAAGGAGGCTGACAGAG      |
| 1029 | Vvi.8007                    | 316       | TGTAAGACGACGGCCAGTGGCTGAGAAGATGGTGT          | CAGGAAACAGCTATGACCCAAATGTGATATGAGCTTGC  |
| 1031 | CF516996                    | 441       | TGTAAGACGACGGCCAGTCTTCTTCTTCAATCAACC         | CAGGAAACAGCTATGACCCGCAAGGCACTTCTCCAT    |
| 1037 | Vvi.461                     | 283       | TGTAAGACGACGGCCAGTCCGCTTCTTCCAGAGC           | CAGGAAACAGCTATGACCTCAGGACTTTGATGCGAG    |
| 1109 | Vvi.6764                    | 354       | TGTAAGACGACGGCCAGTGCAGAACTGATGGAGTTGC        | CAGGAAACAGCTATGACCCGAAAGCAGCAGCAAGATCC  |
| 1119 | Vvi.10                      | 357       | TGTAAGACGACGGCCAGTTAGGCGAAGGATGGCTA          | CAGGAAACAGCTATGACCAAAAGACCTTGGAGCAAT    |
| 1127 | Vvi.85                      | 435       | TGTAAGACGACGGCCAGTCAAGCTATTGCTCTGTGCA        | CAGGAAACAGCTATGACCCGCTCACTGCAACAGAAAT   |
| 1137 | Vvi.129                     | 609       | TGTAAGACGACGGCCAGTGAAGCAACCAAGCATTAGC        | CAGGAAACAGCTATGACCTGTGATTTCTGCGGCAAT    |
| 1151 | Vvi.1307                    | 551       | TGTAAGACGACGGCCAGTCCGCTGATTAAGTGTGAAG        | CAGGAAACAGCTATGACCCGCTTCTGCTGGATG       |
| 1157 | Vvi.2154                    | 439       | TGTAAGACGACGGCCAGTGTGAGATGAAGTAGAGC          | CAGGAAACAGCTATGACCTCAAGCTGTGGAATG       |
| 1161 | Vvi.3370                    | 373       | TGTAAGACGACGGCCAGTGTGACGAGCAGAGTGA           | CAGGAAACAGCTATGACCCCACTCCAGCTGTAGGAA    |
| 1171 | Vvi.7047                    | 355       | TGTAAGACGACGGCCAGTGGAGACAGATTTGGTTAATGC      | CAGGAAACAGCTATGACCCCTTCCCTGATTTCTTTG    |
| 1175 | Vvi.7185                    | 347       | TGTAAGACGACGGCCAGTGGATGGTGAAGAGGAGTGA        | CAGGAAACAGCTATGACCCGTTCCAGTGTGATGAAA    |
| 1191 | Vvi.11961                   | 201       | TGTAAGACGACGGCCAGTCAACACTCAGCTCCGGTAGG       | CAGGAAACAGCTATGACCCGCAACAAAGTTCAGCACA   |
| 1201 | Vvi.12037                   | 360       | TGTAAGACGACGGCCAGTCTTCTTGGATGGCGTAGG         | CAGGAAACAGCTATGACCCGTGAACGCACTGCAAGG    |
| 1211 | Vvi.12138                   | 202       | TGTAAGACGACGGCCAGTGCAGAAATTTGAAGTAGCA        | CAGGAAACAGCTATGACCCGAGTGGTTCGTGAGAAATG  |
| 1213 | Vvi.12158                   | 609       | TGTAAGACGACGGCCAGTTCACATCAGGCGCAAGG          | CAGGAAACAGCTATGACCCGCGTGGAAATGAGTTG     |
| 1215 | Vvi.12195                   | 201       | TGTAAGACGACGGCCAGTGTGATGAATGGCTTTGG          | CAGGAAACAGCTATGACCTGTGATGAGTGGTTAAGA    |
| 1217 | Vvi.12233                   | 220       | TGTAAGACGACGGCCAGTGTGATGAAGAAATTTGG          | CAGGAAACAGCTATGACCCCTTCTGACAGGAGGA      |
| 1229 | Vvi.12341                   | 320       | TGTAAGACGACGGCCAGTCTCTAGCTACCAAGC            | CAGGAAACAGCTATGACCCCTCAACATCCAACTC      |
| 1    | AF450278                    | 1748      | TGTAAGACGACGGCCAGTCTCACTCCTCCTCTCTG          | CAGGAAACAGCTATGACCCATTGGAAGCCTCCTCATCA  |
