# Supplementary material for: High throughput SNP discovery and genotyping in grapevine (Vitis vinifera L.) by combining a re-sequencing approach and SNPlex technology
Source: PubMed Central journal article supplement (PMC2212664; doi:10.1186/1471-2164-8-424), 2007-11-19
Supplement: 1471-2164-8-424-S2.pdf [file 1471-2164-8-424-S2.pdf]

| SNP ID      | Genotyped accessions |                |             | Original accessions |
|-------------|----------------------|----------------|-------------|---------------------|
|             | Gene diversity       | Heterozygosity | MAF         | MAF                 |
| SNP1_351    | 0.30                 | 0.13           | 0.17        | 0.25                |
| SNP129_237  | 0.45                 | 0.32           | 0.32        | 0.45                |
| SNP135_316  | 0.37                 | 0.30           | 0.26        | 0.40                |
| SNP189_131  | 0.32                 | 0.34           | 0.25        | 0.15                |
| SNP191_100  | 0.31                 | 0.23           | 0.17        | 0.11                |
| SNP197_82   | 0.47                 | 0.51           | 0.36        | 0.41                |
| SNP209_255  | 0.30                 | 0.26           | 0.18        | 0.25                |
| SNP217_190  | 0.27                 | 0.26           | 0.14        | 0.14                |
| SNP227_191  | 0.42                 | 0.33           | 0.30        | 0.32                |
| SNP229_112  | 0.48                 | 0.48           | 0.36        | 0.45                |
| SNP241_201  | 0.28                 | 0.27           | 0.21        | 0.25                |
| SNP249_125  | 0.15                 | 0.16           | 0.08        | 0.09                |
| SNP255_265  | 0.46                 | 0.49           | 0.37        | 0.40                |
| SNP259_199  | 0.48                 | 0.44           | 0.40        | 0.45                |
| SNP269_308  | 0.50                 | 0.44           | 0.50        | 0.40                |
| SNP273_298  | 0.27                 | 0.27           | 0.16        | 0.14                |
| SNP273_361  | 0.10                 | 0.11           | 0.06        | 0.05                |
| SNP273_469  | 0.07                 | 0.07           | 0.03        | 0.14                |
| SNP281_64   | 0.44                 | 0.38           | 0.33        | 0.36                |
| SNP283_32   | 0.21                 | 0.18           | 0.14        | 0.10                |
| SNP289_84   | 0.42                 | 0.39           | 0.33        | 0.25                |
| SNP293_20   | 0.12                 | 0.12           | 0.07        | 0.15                |
| SNP311_198  | 0.49                 | 0.34           | 0.42        | 0.32                |
| SNP317_155  | 0.34                 | 0.31           | 0.24        | 0.45                |
| SNP325_65   | 0.28                 | 0.26           | 0.20        | 0.19                |
| SNP341_196  | 0.45                 | 0.43           | 0.35        | 0.40                |
| SNP345_421  | 0.09                 | 0.09           | 0.04        | 0.07                |
| SNP351_85   | 0.40                 | 0.38           | 0.30        | 0.50                |
| SNP355_154  | 0.49                 | 0.42           | 0.44        | 0.33                |
| SNP357_371  | 0.49                 | 0.48           | 0.45        | 0.25                |
| SNP377_251  | 0.47                 | 0.50           | 0.37        | 0.45                |
| SNP391_170  | 0.24                 | 0.24           | 0.12        | 0.08                |
| SNP397_331  | 0.24                 | 0.20           | 0.13        | 0.20                |
| SNP415_209  | 0.28                 | 0.28           | 0.16        | 0.25                |
| SNP421_234  | 0.25                 | 0.17           | 0.13        | 0.14                |
| SNP425_205  | 0.12                 | 0.09           | 0.06        | 0.09                |
| SNP437_129  | 0.31                 | 0.25           | 0.19        | 0.40                |
| SNP447_244  | 0.47                 | 0.44           | 0.45        | 0.40                |
| SNP451_287  | 0.45                 | 0.45           | 0.35        | 0.36                |
| SNP453_375  | 0.49                 | 0.48           | 0.44        | 0.50                |
| SNP457_192  | 0.10                 | 0.09           | 0.04        | 0.10                |
| SNP459_140  | 0.36                 | 0.36           | 0.22        | 0.33                |
| SNP463_296  | 0.05                 | 0.05           | 0.02        | 0.15                |
| SNP477_239  | 0.29                 | 0.21           | 0.16        | 0.21                |
| SNP497_281  | 0.12                 | 0.12           | 0.07        | 0.15                |
| SNP517_224  | 0.48                 | 0.34           | 0.39        | 0.45                |
| SNP533_161  | 0.02                 | 0.02           | 0.01        | 0.07                |
| SNP543_268  | 0.19                 | 0.20           | 0.10        | 0.23                |
| SNP551_351  | 0.23                 | 0.23           | 0.12        | 0.28                |
| SNP553_98   | 0.47                 | 0.40           | 0.39        | 0.27                |
| SNP555_132  | 0.47                 | 0.41           | 0.38        | 0.38                |
| SNP557_104  | 0.29                 | 0.23           | 0.17        | 0.15                |
| SNP559_110  | 0.37                 | 0.37           | 0.23        | 0.50                |
| SNP561_120  | 0.07                 | 0.06           | 0.03        | 0.07                |
| SNP567_341  | 0.35                 | 0.41           | 0.21        | 0.15                |
| SNP571_227  | 0.50                 | 0.56           | 0.48        | 0.36                |
| SNP575_128  | 0.26                 | 0.27           | 0.14        | 0.25                |
| SNP579_187  | 0.23                 | 0.22           | 0.14        | 0.09                |
| SNP581_114  | 0.46                 | 0.57           | 0.39        | 0.32                |
| SNP591_148  | 0.45                 | 0.43           | 0.35        | 0.27                |
| SNP593_149  | 0.47                 | 0.47           | 0.39        | 0.32                |
| SNP605_120i | 0.24                 | 0.21           | 0.14        | 0.18                |
| SNP613_315  | 0.44                 | 0.50           | 0.33        | 0.20                |
| SNP625_278  | 0.13                 | 0.10           | 0.08        | 0.09                |
| SNP635_21   | 0.27                 | 0.22           | 0.16        | 0.13                |
| SNP649_567  | 0.49                 | 0.36           | 0.40        | 0.50                |
| SNP651_658  | 0.03                 | 0.03           | 0.01        | 0.14                |
| SNP653_90   | 0.44                 | 0.31           | 0.30        | 0.23                |
| SNP655_93   | 0.28                 | 0.26           | 0.16        | 0.23                |
| SNP659_73   | 0.48                 | 0.41           | 0.40        | 0.32                |
| SNP683_120  | 0.08                 | 0.07           | 0.05        | 0.09                |
| SNP691_139  | 0.50                 | 0.41           | 0.49        | 0.27                |
| SNP697_296  | 0.26                 | 0.23           | 0.14        | 0.14                |
| SNP699_311  | 0.28                 | 0.24           | 0.14        | 0.17                |
| SNP709_258  | 0.38                 | 0.40           | 0.25        | 0.33                |
| SNP715_260  | 0.10                 | 0.11           | 0.06        | 0.20                |
| SNP811_42   | 0.39                 | 0.43           | 0.28        | 0.40                |
| SNP817_209  | 0.12                 | 0.13           | 0.07        | 0.11                |
| SNP819_210  | 0.49                 | 0.47           | 0.43        | 0.45                |
| SNP829_281  | 0.50                 | 0.44           | 0.48        | 0.50                |
| <b>Mean</b> | <b>0.32</b>          | <b>0.30</b>    | <b>0.24</b> | <b>0.26</b>         |
