# Supplementary material for: High throughput SNP discovery and genotyping in grapevine (Vitis vinifera L.) by combining a re-sequencing approach and SNPlex technology
Source: PubMed Central journal article supplement (PMC2212664; doi:10.1186/1471-2164-8-424), 2007-11-19
Supplement: 1471-2164-8-424-S3.pdf [file 1471-2164-8-424-S3.pdf]

| Code  | Name                            | Main use | Repository          |
|-------|---------------------------------|----------|---------------------|
| 14A22 | Clairette Blanche               | wine     | IMIDRA <sup>1</sup> |
| 14B14 | Muscat Ottonel                  | table    | IMIDRA              |
| 14B17 | Muscat Santa Vallier            | table    | IMIDRA              |
| 14B22 | Mondina                         | wine     | IMIDRA              |
| 14D20 | Segregada 22-52                 | table    | IMIDRA              |
| 14E29 | Doroni Maceron                  | table    | IMIDRA              |
| 14F05 | Kalili                          | table    | IMIDRA              |
| 14F10 | Foster's White                  | table    | IMIDRA              |
| 14I07 | Red Ohanes                      | table    | IMIDRA              |
| 22A19 | Morisca                         | wine     | IMIDRA              |
| 22A21 | Maturana                        | wine     | IMIDRA              |
| 22A31 | Ribote                          | wine     | IMIDRA              |
| 22A32 | Venus de Huarte                 | wine     | IMIDRA              |
| 22A37 | Jeronimo de Tudela              | wine     | IMIDRA              |
| 22A38 | Redondal                        | table    | IMIDRA              |
| 22A40 | Tempranillo                     | wine     | IMIDRA              |
| 22A43 | Graciano                        | wine     | IMIDRA              |
| 22A44 | Mazuelo                         | wine     | IMIDRA              |
| 22B01 | Negra Tardía                    | table    | IMIDRA              |
| 22B02 | Ragol                           | table    | IMIDRA              |
| 22B03 | Ciruela Roja                    | table    | IMIDRA              |
| 22B04 | Dominga                         | table    | IMIDRA              |
| 22B05 | Molinera                        | table    | IMIDRA              |
| 22B10 | Palomino de Jerez               | wine     | IMIDRA              |
| 22B12 | Palomino 84                     | wine     | IMIDRA              |
| 22B18 | Gabriela                        | wine     | IMIDRA              |
| 22B32 | Torrontes                       | wine     | IMIDRA              |
| 22B35 | Vijiriega Comun                 | wine     | IMIDRA              |
| 22B45 | Plateado                        | wine     | IMIDRA              |
| 22C01 | Negra Rayada                    | wine     | IMIDRA              |
| 22C05 | Imperial                        | table    | IMIDRA              |
| 22C08 | Jaen Negro                      | wine     | IMIDRA              |
| 22C11 | Zalema                          | wine     | IMIDRA              |
| 22C14 | Rocia                           | wine     | IMIDRA              |
| 22C15 | Pedro Luis                      | wine     | IMIDRA              |
| 22C16 | Listan Blanca                   | wine     | IMIDRA              |
| 22C18 | Garrido Macho                   | wine     | IMIDRA              |
| 22C22 | Del Rey                         | wine     | IMIDRA              |
| 22C24 | Beba                            | table    | IMIDRA              |
| 22C26 | Garrido Fino                    | wine     | IMIDRA              |
| 22C27 | Perruna                         | wine     | IMIDRA              |
| 22C43 | Cojonata                        | wine     | IMIDRA              |
| 22C44 | Moscatei Negro                  | table    | IMIDRA              |
| 22C45 | Moscatei Malaga                 | table    | IMIDRA              |
| 22C50 | Rey                             | wine     | IMIDRA              |
| 22C58 | Mollar                          | wine     | IMIDRA              |
| 22E05 | Quiebratinajas Blanco           | wine     | IMIDRA              |
| 22E08 | Cadrete                         | wine     | IMIDRA              |
| 22G04 | Tetona Blanca                   | wine     | IMIDRA              |
| 22G38 | Cañiñena Blanca                 | wine     | IMIDRA              |
| 22H17 | Tarragoni                       | wine     | IMIDRA              |
| 22H19 | Garnacha Peluda                 | wine     | IMIDRA              |
| 22H49 | Albillo                         | wine     | IMIDRA              |
| 22H51 | Rojal Blanco                    | wine     | IMIDRA              |
| 22I11 | Rojal                           | wine     | IMIDRA              |
| 22I34 | Rojal                           | wine     | IMIDRA              |
| 22J50 | Tinto Navalcamero               | wine     | IMIDRA              |
| 22K17 | Gualarido                       | table    | IMIDRA              |
| 22K38 | Albillo Mayor                   | wine     | IMIDRA              |
| 22L30 | Garnacho                        | wine     | IMIDRA              |
| 22L40 | Verdejo                         | wine     | IMIDRA              |
| 22L43 | Salvador                        | wine     | IMIDRA              |
| 22M07 | Morisca                         | wine     | IMIDRA              |
| 22M12 | Fernán Piriz                    | wine     | IMIDRA              |
| 22M17 | Eva                             | table    | IMIDRA              |
| 22M35 | Albillo Real                    | wine     | IMIDRA              |
| 22N21 | Treixadura                      | wine     | IMIDRA              |
| 22N56 | Alado                           | table    | IMIDRA              |
| 22O10 | Bobal                           | wine     | IMIDRA              |
| 22O11 | Monastrell                      | wine     | IMIDRA              |
| 22O18 | More                            | table    | IMIDRA              |
| 22O22 | Mondragon                       | wine     | IMIDRA              |
| 22O23 | Castellano                      | wine     | IMIDRA              |
| 22O27 | Messeguera                      | wine     | IMIDRA              |
| 22O44 | Grumiere Blanco                 | wine     | IMIDRA              |
| 22O46 | Gateta                          | table    | IMIDRA              |
| 22O52 | Morenillo                       | wine     | IMIDRA              |
| 22O53 | Pampolat de Sagunto             | wine     | IMIDRA              |
| 22O55 | Verdii                          | wine     | IMIDRA              |
| 22O57 | Grumiere Negro                  | wine     | IMIDRA              |
| 22O66 | Planta de Pedralba              | wine     | IMIDRA              |
| 25A01 | Perla de Csaba                  | table    | IMIDRA              |
| 25A04 | Bruni 036                       | table    | IMIDRA              |
| 25A05 | Madeleine Royal                 | table    | IMIDRA              |
| 25A11 | Agostenga                       | wine     | IMIDRA              |
| 25A15 | Precoce de Malingre             | table    | IMIDRA              |
| 25A21 | Muscat Saint Laurent            | table    | IMIDRA              |
| 25B05 | El Gouz                         | table    | IMIDRA              |
| 25B07 | Gradiska                        | table    | IMIDRA              |
| 25B08 | Propseri 008                    | table    | IMIDRA              |
| 25B10 | Bruni 041                       | table    | IMIDRA              |
| 25B11 | Panse Precoce                   | table    | IMIDRA              |
| 25B15 | Admirable de Courtiller         | table    | IMIDRA              |
| 25B18 | Angiola Bianca                  | table    | IMIDRA              |
| 25B22 | Palestina 1                     | table    | IMIDRA              |
| 25C05 | Foster's White Seedling         | table    | IMIDRA              |
| 25C12 | Schiradzouli Bianco             | table    | IMIDRA              |
| 25C16 | Meslier Hatif                   | table    | IMIDRA              |
| 25C17 | Diamant Traube                  | table    | IMIDRA              |
| 25C19 | Superzibibbo                    | table    | IMIDRA              |
| 25C20 | Japinkay                        | table    | IMIDRA              |
| 25C21 | Sauvignon                       | table    | IMIDRA              |
| 25C23 | Moscat Gustav Szauter           | table    | IMIDRA              |
| 25D01 | Favorita de Cornegliano         | table    | IMIDRA              |
| 25D03 | Wratchanski Misket              | table    | IMIDRA              |
| 25D05 | Moscato Di Terracina            | table    | IMIDRA              |
| 25D08 | Sideritis                       | table    | IMIDRA              |
| 25D09 | Aurora                          | table    | IMIDRA              |
| 25D10 | Zarina Na Losiata x Bolgar 19-2 | table    | IMIDRA              |
| 25D11 | Lacrima Di Maria                | table    | IMIDRA              |
| 25D15 | Ciclopica                       | table    | IMIDRA              |

| Code     | Name                               | Main use | Repository         |
|----------|------------------------------------|----------|--------------------|
| 25D17    | Baresana                           | table    | IMIDRA             |
| 25E01    | Smederevka                         | wine     | IMIDRA             |
| 25E06    | Gallura Zenni de Damasco           | table    | IMIDRA             |
| 25E07    | Vivona 378                         | table    | IMIDRA             |
| 25E12    | Olivette Barthelet                 | table    | IMIDRA             |
| 25E18    | Pirovano 575                       | table    | IMIDRA             |
| 25E22    | Ciminnita                          | table    | IMIDRA             |
| 25E24    | Fogoneu                            | wine     | IMIDRA             |
| 25F06    | Talismano                          | table    | IMIDRA             |
| 25F14    | Volta                              | table    | IMIDRA             |
| 25F16    | Roi de Precoces                    | table    | IMIDRA             |
| 25F17    | Chaouch Rose                       | table    | IMIDRA             |
| 25F19    | Cardinal                           | table    | IMIDRA             |
| 25F20    | Perla de Csaba                     | table    | IMIDRA             |
| 25F22    | Chasselass Violet                  | table    | IMIDRA             |
| 25F23    | Chasselass Rose                    | table    | IMIDRA             |
| 25G01    | Portugues Azul                     | wine     | IMIDRA             |
| 25G03    | Queen Kearney                      | table    | IMIDRA             |
| 25G14    | Cornichon Violet                   | table    | IMIDRA             |
| 25G17    | Prune de Cazouls                   | table    | IMIDRA             |
| 25G19    | Alphonse Lavallee                  | table    | IMIDRA             |
| 25G22    | Apesorgia Nera                     | table    | IMIDRA             |
| 25G23    | Plovina                            | wine     | IMIDRA             |
| 25H02    | Oillade Noir                       | table    | IMIDRA             |
| 25H03    | Piriquta                           | wine     | IMIDRA             |
| 25H04    | Moscato Del Adda                   | table    | IMIDRA             |
| 25H05    | Moscato de Hamburgo                | table    | IMIDRA             |
| 25H07    | Cinsaut                            | table    | IMIDRA             |
| 25H10    | Ciliegiuolo Nero                   | table    | IMIDRA             |
| 25H11    | Criolla                            | table    | IMIDRA             |
| 25H14    | Superba                            | table    | IMIDRA             |
| 25H18    | Perla Nera                         | table    | IMIDRA             |
| 25H19    | Bruni 090                          | table    | IMIDRA             |
| 25H22    | Gemre                              | table    | IMIDRA             |
| 25I02    | Barbabeleu                         | table    | IMIDRA             |
| 25I07    | Pirovano 771                       | table    | IMIDRA             |
| 25I08    | Maria Rosa                         | table    | IMIDRA             |
| 25I10    | Inzolia Nera                       | table    | IMIDRA             |
| 25I11    | Darkaia Nera                       | table    | IMIDRA             |
| 25I12    | Royal                              | table    | IMIDRA             |
| 25I15    | Lassina                            | table    | IMIDRA             |
| 25I16    | Ahmeur Bou Ahmeur                  | table    | IMIDRA             |
| 25I17    | 620 Pirovano                       | table    | IMIDRA             |
| 25I18    | Rosaki Noir des Semis              | table    | IMIDRA             |
| 25I19    | Venco                              | table    | IMIDRA             |
| 25I20    | Fraula Kakini                      | table    | IMIDRA             |
| 25I21    | El Faryail                         | table    | IMIDRA             |
| 25I22    | Gros Maroc                         | table    | IMIDRA             |
| 25I23    | Danugue                            | table    | IMIDRA             |
| 25I24    | Mistress Hall                      | table    | IMIDRA             |
| 25J11    | Glaciere                           | table    | IMIDRA             |
| 25J12    | Prunesta Nera                      | wine     | IMIDRA             |
| 25J13    | Colgar Roja                        | table    | IMIDRA             |
| 25J14    | Pergolese                          | table    | IMIDRA             |
| 25J15    | Pizzutello Nero                    | table    | IMIDRA             |
| 25J16    | Almeria Nera                       | table    | IMIDRA             |
| 25J17    | Local Black                        | table    | IMIDRA             |
| 25J18    | Emperor                            | table    | IMIDRA             |
| 25J19    | Olivetta Nera                      | table    | IMIDRA             |
| 25J23    | Corinthe Blanc                     | table    | IMIDRA             |
| 25J24    | Chasselass Apyrene                 | table    | IMIDRA             |
| 25J3     | Black Alicante                     | table    | IMIDRA             |
| 25J4     | Dattier Noir                       | table    | IMIDRA             |
| 25J7     | Ophthalmo                          | table    | IMIDRA             |
| 25J9     | Marsigliana                        | wine     | IMIDRA             |
| 25K03    | Maria Pirovano                     | table    | IMIDRA             |
| 25K09    | Canner Seedless                    | table    | IMIDRA             |
| 25K1     | Graziella 1                        | table    | IMIDRA             |
| 25K17    | Black Currant                      | table    | IMIDRA             |
| 25K19    | Beauty Seedless                    | table    | IMIDRA             |
| 25K2     | Sultanina                          | table    | IMIDRA             |
| 25K20    | Black Monucca                      | table    | IMIDRA             |
| 25K21    | Sultanina Roja                     | table    | IMIDRA             |
| 25K22    | Sultanina Rosa                     | table    | IMIDRA             |
| 25K4     | Pirovano 166A                      | table    | IMIDRA             |
| 25L03    | Turki                              | table    | IMIDRA             |
| 25L05    | Conca D'oro                        | table    | IMIDRA             |
| 25L20    | Pirovano 155                       | table    | IMIDRA             |
| 25L22    | Zeini Abiad                        | table    | IMIDRA             |
| 25M07    | Al Izum Beli                       | table    | IMIDRA             |
| 25M11    | Balbal                             | table    | IMIDRA             |
| 25M13    | Patricia                           | table    | IMIDRA             |
| 25M16    | Marieta                            | table    | IMIDRA             |
| 25VI_A03 | Nincusa                            | table    | IMIDRA             |
| 91_123_5 | Dominga x Autumn Seedless 91-123-5 | progeny  | IMIDA <sup>2</sup> |
| 91_88_29 | Dominga x Autumn Seedless 91-88-29 | progeny  | IMIDA              |
| 91_88_31 | Dominga x Autumn Seedless 91-88-31 | progeny  | IMIDA              |
| 91_88_77 | Dominga x Autumn Seedless 91-88-77 | progeny  | IMIDA              |
| 91_89_10 | Dominga x Autumn Seedless 91-89-10 | progeny  | IMIDA              |
| 91_89_13 | Dominga x Autumn Seedless 91-89-13 | progeny  | IMIDA              |
| 91_89_32 | Dominga x Autumn Seedless 91-89-32 | progeny  | IMIDA              |
| 91_90_01 | Dominga x Autumn Seedless 91-90-01 | progeny  | IMIDA              |
| 91_90_04 | Dominga x Autumn Seedless 91-90-04 | progeny  | IMIDA              |
| 91_90_05 | Dominga x Autumn Seedless 91-90-05 | progeny  | IMIDA              |
| 91_90_10 | Dominga x Autumn Seedless 91-90-10 | progeny  | IMIDA              |
| 91_90_11 | Dominga x Autumn Seedless 91-90-11 | progeny  | IMIDA              |
| 91_90_12 | Dominga x Autumn Seedless 91-90-12 | progeny  | IMIDA              |
| 91_90_15 | Dominga x Autumn Seedless 91-90-15 | progeny  | IMIDA              |
| 91_90_18 | Dominga x Autumn Seedless 91-90-18 | progeny  | IMIDA              |
| Aut_S    | Autumn Seedless                    | table    | IMIDA              |
| BA_1_6   | Rio Ardila                         | wild     | IMIDRA             |
| BA_2_1   | Los Remedios 1                     | wild     | IMIDRA             |
| BA_2_2   | Los Remedios 1                     | wild     | IMIDRA             |
| BA_2_3   | Los Remedios 1                     | wild     | IMIDRA             |
| BA_2_4   | Los Remedios 1                     | wild     | IMIDRA             |
| BA_2_5   | Los Remedios 1                     | wild     | IMIDRA             |
| BA_2_6   | Los Remedios                       | wild     | IMIDRA             |
| BA_2_6   | Los Remedios                       | wild     | IMIDRA             |
| CA_10_1  | Ribera de Barria                   | wild     | IMIDRA             |
| CA_11_1  | La Algaida                         | wild     | IMIDRA             |
| CA_11_2  | La Algaida                         | wild     | IMIDRA             |

| Code       | Name                              | Main use | Repository       |
|------------|-----------------------------------|----------|------------------|
| CA_11_3    | La Algaída                        | wild     | IMIDRA           |
| CA_13_8    | Arroyo Mayeruela                  | wild     | IMIDRA           |
| CA_2_7     | Río Del Bosque                    | wild     | IMIDRA           |
| CA_3_4     | Manatíal El Quejido               | wild     | IMIDRA           |
| CA_4_3     | Pantano de Los Hurones            | wild     | IMIDRA           |
| CA_5_1     | Tío Tavizna                       | wild     | IMIDRA           |
| CA_6_1     | Prado El Rey                      | wild     | IMIDRA           |
| CA_7_1     | Las Montañas                      | wild     | IMIDRA           |
| CA_9_1     | Ribera Millan                     | wild     | IMIDRA           |
| CO_1_1     | Arroyo Bejarano                   | wild     | IMIDRA           |
| CO_1_2     | Arroyo Bejarano                   | wild     | IMIDRA           |
| CO_1_4     | Arroyo Bejarano                   | wild     | IMIDRA           |
| CO_1_5     | Arroyo Bejarano                   | wild     | IMIDRA           |
| CO_1_6     | Arroyo Bejarano                   | wild     | IMIDRA           |
| CO_1_7     | Arroyo Bejarano                   | wild     | IMIDRA           |
| CO_1_8     | Arroyo Bejarano                   | wild     | IMIDRA           |
| CO_2_1     | Villaviciosa-Valdelasfuentes      | wild     | IMIDRA           |
| CO_2_2     | Villaviciosa-Valdelasfuentes      | wild     | IMIDRA           |
| CO_2_4     | Villaviciosa-Valdelasfuentes      | wild     | IMIDRA           |
| CO_2_5     | Villaviciosa-Valdelasfuentes      | wild     | IMIDRA           |
| CO_2_6     | Villaviciosa-Valdelasfuentes      | wild     | IMIDRA           |
| CO_3_1     | Posadas Río Guadalvacarejo        | wild     | IMIDRA           |
| CO_3_2     | Posadas Río Guadalvacarejo        | wild     | IMIDRA           |
| CO_3_3     | Posadas Río Guadalvacarejo        | wild     | IMIDRA           |
| CO_3_4     | Posadas Río Guadalvacarejo        | wild     | IMIDRA           |
| CO_3_5     | Posadas Río Guadalvacarejo        | wild     | IMIDRA           |
| CO_3_6     | Posadas Río Guadalvacarejo        | wild     | IMIDRA           |
| CO_3_8     | Posadas Río Guadalvacarejo        | wild     | IMIDRA           |
| CO_4_1     | Río Guadalquivir Alcolea          | wild     | IMIDRA           |
| CO_4_2     | Río Guadalquivir Alcolea          | wild     | IMIDRA           |
| CO_4_3     | Río Guadalquivir Alcolea          | wild     | IMIDRA           |
| CO_4_5     | Río Guadalquivir Alcolea          | wild     | IMIDRA           |
| CO_4_8     | Río Guadalquivir Alcolea          | wild     | IMIDRA           |
| CO_4_9     | Río Guadalquivir Alcolea          | wild     | IMIDRA           |
| CO_5_1     | Río Guadamellato                  | wild     | IMIDRA           |
| CO_5_2     | Río Guadamellato                  | wild     | IMIDRA           |
| CO_5_4     | Río Guadamellato                  | wild     | IMIDRA           |
| CO_5_5     | Río Guadamellato                  | wild     | IMIDRA           |
| CO_6_1     | Carretera de Cardeña              | wild     | IMIDRA           |
| CO_6_2     | Carretera de Cardeña              | wild     | IMIDRA           |
| CO_6_3     | Carretera de Cardeña              | wild     | IMIDRA           |
| CO_6_4     | Carretera de Cardeña              | wild     | IMIDRA           |
| CO_6_5     | Carretera de Cardeña              | wild     | IMIDRA           |
| Crimson    | Crimson                           | table    | IMIDA            |
| CSxM_10    | Cabernet Sauvignon x Moscatuel 10 | progeny  | IMIDA            |
| CSxM_16    | Cabernet Sauvignon x Moscatuel 16 | progeny  | IMIDA            |
| CSxM_19    | Cabernet Sauvignon x Moscatuel 19 | progeny  | IMIDA            |
| CSxM_23    | Cabernet Sauvignon x Moscatuel 23 | progeny  | IMIDA            |
| CSxM_24    | Cabernet Sauvignon x Moscatuel 24 | progeny  | IMIDA            |
| CSxM_27    | Cabernet Sauvignon x Moscatuel 27 | progeny  | IMIDA            |
| CSxM_30    | Cabernet Sauvignon x Moscatuel 30 | progeny  | IMIDA            |
| CSxM_32    | Cabernet Sauvignon x Moscatuel 32 | progeny  | IMIDA            |
| CSxM_33    | Cabernet Sauvignon x Moscatuel 33 | progeny  | IMIDA            |
| CSxM_35    | Cabernet Sauvignon x Moscatuel 35 | progeny  | IMIDA            |
| CSxM_39    | Cabernet Sauvignon x Moscatuel 39 | progeny  | IMIDA            |
| CSxM_40    | Cabernet Sauvignon x Moscatuel 40 | progeny  | IMIDA            |
| CSxM_41    | Cabernet Sauvignon x Moscatuel 41 | progeny  | IMIDA            |
| CSxM_5     | Cabernet Sauvignon x Moscatuel 5  | progeny  | IMIDA            |
| CSxM_7     | Cabernet Sauvignon x Moscatuel 7  | progeny  | IMIDA            |
| CSxM_8     | Cabernet Sauvignon x Moscatuel 8  | progeny  | IMIDA            |
| CS         | Cabernet Sauvignon                | wine     | IMIDRA           |
| Dominga    | Dominga                           | table    | IMIDA            |
| GP_16      | Garnacha Peluda Selfed 16         | progeny  | CNB <sup>3</sup> |
| GP_18      | Garnacha Peluda Selfed 18         | progeny  | CNB              |
| GP_4       | Garnacha Peluda Selfed 4          | progeny  | CNB              |
| GP_6       | Garnacha Peluda Selfed 6          | progeny  | CNB              |
| GP_8       | Garnacha Peluda Selfed 8          | progeny  | CNB              |
| GP_9       | Garnacha Peluda Selfed 9          | progeny  | CNB              |
| H_1_1      | Rivera de Odiel                   | wild     | IMIDRA           |
| H_1_2      | Rivera de Odiel                   | wild     | IMIDRA           |
| H_2_1      | Río Murtiga                       | wild     | IMIDRA           |
| H_2_2      | Río Murtiga                       | wild     | IMIDRA           |
| H_2_3      | Río Murtiga                       | wild     | IMIDRA           |
| H_2_4      | Río Murtiga                       | wild     | IMIDRA           |
| H_2_5      | Río Murtiga                       | wild     | IMIDRA           |
| H_2_6      | Río Murtiga                       | wild     | IMIDRA           |
| H_3_1      | Barranco Olla                     | wild     | IMIDRA           |
| H_6_1      | Marisma 1                         | wild     | IMIDRA           |
| H_6_3      | Marisma 1                         | wild     | IMIDRA           |
| H_6_4      | Marisma 1                         | wild     | IMIDRA           |
| H_7_2      | Marisma 2                         | wild     | IMIDRA           |
| H_7_5      | Marisma 2                         | wild     | IMIDRA           |
| MA_1_1     | Venta El Hondon                   | wild     | IMIDRA           |
| MA_2_1     | Río Turon 1                       | wild     | IMIDRA           |
| MA_2_3     | Río Turon 1                       | wild     | IMIDRA           |
| MA_2_4     | Río Turon 1                       | wild     | IMIDRA           |
| MA_2_7     | Río Turon 1                       | wild     | IMIDRA           |
| MA_2_8     | Río Turon 1                       | wild     | IMIDRA           |
| MA_3_1     | Río Turon 2                       | wild     | IMIDRA           |
| MA_3_3     | Río Turon 2                       | wild     | IMIDRA           |
| MA_3_4     | Río Turon 2                       | wild     | IMIDRA           |
| MA_3_5     | Río Turon 2                       | wild     | IMIDRA           |
| MA_3_6     | Río Turon 2                       | wild     | IMIDRA           |
| MA_3_7     | Río Turon 2                       | wild     | IMIDRA           |
| MA_3_8     | Río Turon 2                       | wild     | IMIDRA           |
| MA_3_9     | Río Turon 2                       | wild     | IMIDRA           |
| Monastrell | Monastrell                        | wine     | IMIDA            |
| Mos_Ham    | Moscatel Hamburgo                 | table    | IMIDA            |
| MHxSO_23   | Moscatel Hamburgo x Sugraone_23   | progeny  | IMIDA            |
| MHxSO_24   | Moscatel Hamburgo x Sugraone_24   | progeny  | IMIDA            |
| MHxSO_25   | Moscatel Hamburgo x Sugraone_25   | progeny  | IMIDA            |
| MHxSO_26   | Moscatel Hamburgo x Sugraone_26   | progeny  | IMIDA            |
| MHxSO_27   | Moscatel Hamburgo x Sugraone_27   | progeny  | IMIDA            |
| MHxSO_28   | Moscatel Hamburgo x Sugraone_28   | progeny  | IMIDA            |
| MHxSO_29   | Moscatel Hamburgo x Sugraone_29   | progeny  | IMIDA            |
| MHxSO_33   | Moscatel Hamburgo x Sugraone_33   | progeny  | IMIDA            |
| MHxSO_34   | Moscatel Hamburgo x Sugraone_34   | progeny  | IMIDA            |
| MHxSO_35   | Moscatel Hamburgo x Sugraone_35   | progeny  | IMIDA            |
| MHxSO_36   | Moscatel Hamburgo x Sugraone_36   | progeny  | IMIDA            |
| Moscatu    | Moscatuel                         | table    | IMIDA            |
| PT_1_1     | Riveira de Toutalga               | wild     | IMIDRA           |

| Code                                                                                                                                                                                                                                                    | Name                    | Main use      | Repository |
|---------------------------------------------------------------------------------------------------------------------------------------------------------------------------------------------------------------------------------------------------------|-------------------------|---------------|------------|
| PT_1_5                                                                                                                                                                                                                                                  | Riveira de Toutalga     | wild          | IMIDRA     |
| Ruby                                                                                                                                                                                                                                                    | Ruby Seedless           | table         | IMIDA      |
| RxM_14                                                                                                                                                                                                                                                  | Ruby x Moscatuel 14     | progeny       | IMIDA      |
| RxM_18                                                                                                                                                                                                                                                  | Ruby x Moscatuel 18     | progeny       | IMIDA      |
| RxM_19                                                                                                                                                                                                                                                  | Ruby x Moscatuel 19     | progeny       | IMIDA      |
| RxM_22                                                                                                                                                                                                                                                  | Ruby x Moscatuel 22     | progeny       | IMIDA      |
| RxM_26                                                                                                                                                                                                                                                  | Ruby x Moscatuel 26     | progeny       | IMIDA      |
| RxM_27                                                                                                                                                                                                                                                  | Ruby x Moscatuel 27     | progeny       | IMIDA      |
| RxM_31                                                                                                                                                                                                                                                  | Ruby x Moscatuel 31     | progeny       | IMIDA      |
| RxM_34                                                                                                                                                                                                                                                  | Ruby x Moscatuel 34     | progeny       | IMIDA      |
| RxM_47                                                                                                                                                                                                                                                  | Ruby x Moscatuel 47     | progeny       | IMIDA      |
| RxM_49                                                                                                                                                                                                                                                  | Ruby x Moscatuel 49     | progeny       | IMIDA      |
| RxM_58                                                                                                                                                                                                                                                  | Ruby x Moscatuel 58     | progeny       | IMIDA      |
| SE_1_1                                                                                                                                                                                                                                                  | Los Melonares           | wild          | IMIDRA     |
| SE_1_2                                                                                                                                                                                                                                                  | Los Melonares           | wild          | IMIDRA     |
| SE_2_1                                                                                                                                                                                                                                                  | Castillo de Las Guardas | wild          | IMIDRA     |
| SE_2_3                                                                                                                                                                                                                                                  | Castillo de Las Guardas | wild          | IMIDRA     |
| SE_2_4                                                                                                                                                                                                                                                  | Castillo de Las Guardas | wild          | IMIDRA     |
| SE_2_8                                                                                                                                                                                                                                                  | Castillo de Las Guardas | wild          | IMIDRA     |
| SE_3_1                                                                                                                                                                                                                                                  | El Martinete            | wild          | IMIDRA     |
| SE_3_5                                                                                                                                                                                                                                                  | El Martinete            | wild          | IMIDRA     |
| SE_4_1                                                                                                                                                                                                                                                  | Rivera del Huéznar      | wild          | IMIDRA     |
| SNPs1                                                                                                                                                                                                                                                   | Cabernet Sauvignon      | SNP discovery | IMIDRA     |
| SNPs2                                                                                                                                                                                                                                                   | Syrah                   | SNP discovery | IMIDRA     |
| SNPs3                                                                                                                                                                                                                                                   | Pinot Noir              | SNP discovery | IMIDRA     |
| SNPs4                                                                                                                                                                                                                                                   | Garnacha                | SNP discovery | IMIDRA     |
| SNPs5                                                                                                                                                                                                                                                   | Tempranillo             | SNP discovery | IMIDRA     |
| SNPs6                                                                                                                                                                                                                                                   | Malvasia de Sitges      | SNP discovery | IMIDRA     |
| SNPs7                                                                                                                                                                                                                                                   | Moscatel Grano Menudo   | SNP discovery | IMIDRA     |
| SNPs8                                                                                                                                                                                                                                                   | Sultanina               | SNP discovery | IMIDRA     |
| SNPs9                                                                                                                                                                                                                                                   | Ahmeur Bou Ahmeur       | SNP discovery | IMIDRA     |
| Sugraone                                                                                                                                                                                                                                                | Sugraone                | table         | IMIDA      |
| 25_VII_A03                                                                                                                                                                                                                                              | Torraiba                | wine          | IMIDRA     |
| 25_VIII_B19                                                                                                                                                                                                                                             | Bayad                   | table         | IMIDRA     |
| 25_VIII_B20                                                                                                                                                                                                                                             | Kischmisch Ali Blanc    | table         | IMIDRA     |
| <sup>1</sup> IMIDRA: Instituto Madrileño de Investigación y Desarrollo Rural, Agrario y Alimentario<br><sup>2</sup> IMIDA: Instituto Murciano de Investigación y Desarrollo Agrario y Alimentario<br><sup>3</sup> CNB: Centro Nacional de Biotecnología |                         |               |            |
