# Supplementary material for: High throughput SNP discovery and genotyping in grapevine (Vitis vinifera L.) by combining a re-sequencing approach and SNPlex technology
Source: PubMed Central journal article supplement (PMC2212664; doi:10.1186/1471-2164-8-424), 2007-11-19

# MAF

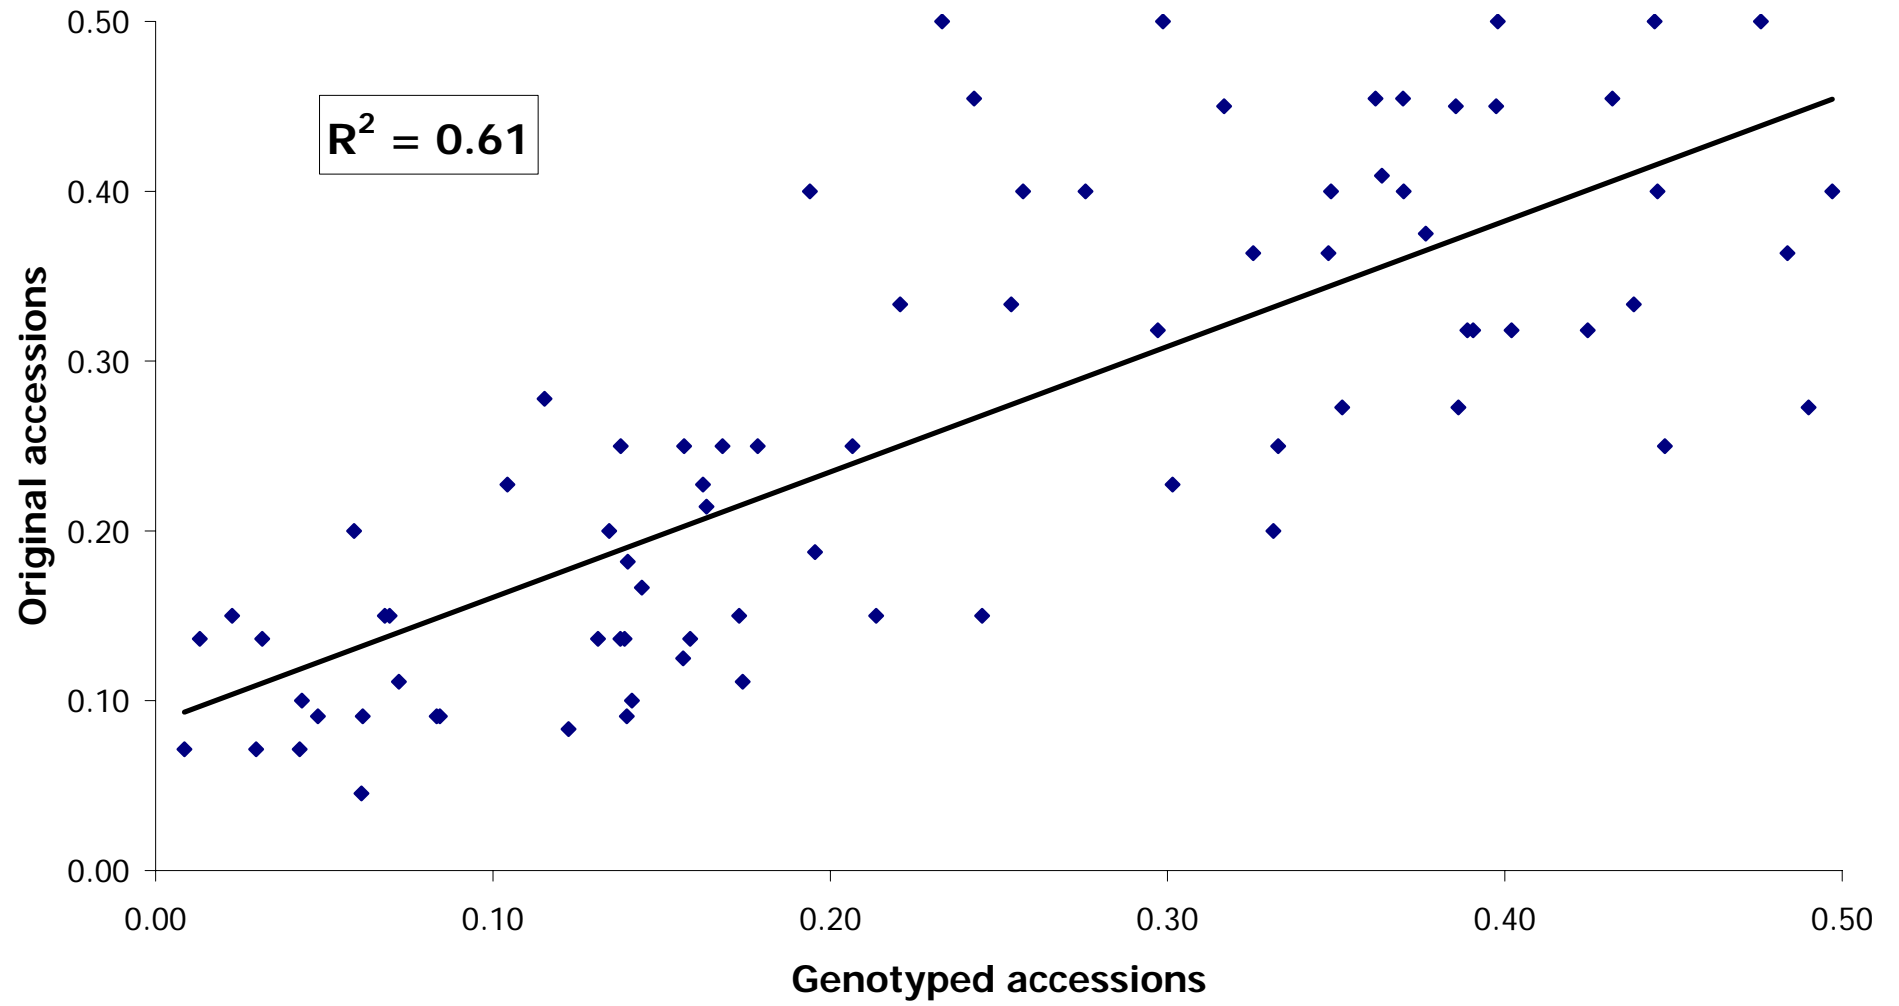

Supplement: 1471-2164-8-424-S4.pdf [file 1471-2164-8-424-S4.pdf]
