# Supplementary material for: High throughput SNP discovery and genotyping in grapevine (Vitis vinifera L.) by combining a re-sequencing approach and SNPlex technology
Source: PubMed Central journal article supplement (PMC2212664; doi:10.1186/1471-2164-8-424), 2007-11-19
Supplement: 1471-2164-8-424-S5.pdf [file 1471-2164-8-424-S5.pdf]

| SNP ID      | All  | Wild        | Table       | Wine        |
|-------------|------|-------------|-------------|-------------|
| SNP1_351    | 0.17 | <b>0.48</b> | <b>0.05</b> | <b>0.02</b> |
| SNP129_237  | 0.32 | 0.30        | 0.39        | 0.29        |
| SNP135_316  | 0.26 | <b>0.15</b> | <b>0.38</b> | <b>0.10</b> |
| SNP189_131  | 0.25 | <b>0.11</b> | 0.25        | 0.18        |
| SNP191_100  | 0.17 | <b>0.39</b> | 0.11        | 0.08        |
| SNP197_82   | 0.36 | 0.45        | <b>0.27</b> | 0.35        |
| SNP209_255  | 0.18 | <b>0.28</b> | 0.14        | 0.13        |
| SNP217_190  | 0.14 | <b>0.27</b> | 0.14        | 0.07        |
| SNP227_191  | 0.30 | <b>0.49</b> | <b>0.22</b> | 0.22        |
| SNP229_112  | 0.36 | 0.35        | <b>0.27</b> | 0.38        |
| SNP241_201  | 0.21 | 0.24        | 0.15        | <b>0.11</b> |
| SNP249_125  | 0.08 | 0.08        | 0.07        | 0.12        |
| SNP255_265  | 0.37 | <b>0.27</b> | <b>0.50</b> | 0.26        |
| SNP259_199  | 0.40 | <b>0.23</b> | <b>0.49</b> | 0.36        |
| SNP269_308  | 0.50 | <b>0.29</b> | <b>0.35</b> | <b>0.36</b> |
| SNP273_298  | 0.16 | 0.13        | 0.14        | 0.21        |
| SNP273_361  | 0.06 | 0.02        | 0.08        | 0.05        |
| SNP273_469  | 0.03 | 0.01        | <b>0.07</b> | 0.02        |
| SNP281_64   | 0.33 | 0.37        | 0.29        | 0.40        |
| SNP283_32   | 0.14 | <b>0.05</b> | 0.15        | 0.06        |
| SNP289_84   | 0.33 | <b>0.19</b> | 0.28        | <b>0.47</b> |
| SNP293_20   | 0.07 | <b>0.01</b> | 0.09        | 0.04        |
| SNP311_198  | 0.42 | <b>0.25</b> | <b>0.28</b> | <b>0.25</b> |
| SNP317_155  | 0.24 | 0.19        | 0.20        | 0.28        |
| SNP325_65   | 0.20 | <b>0.07</b> | 0.19        | <b>0.31</b> |
| SNP341_196  | 0.35 | 0.32        | 0.34        | 0.38        |
| SNP345_421  | 0.04 | 0.06        | 0.05        | 0.04        |
| SNP351_85   | 0.30 | <b>0.10</b> | 0.33        | 0.37        |
| SNP355_154  | 0.44 | 0.39        | 0.37        | <b>0.25</b> |
| SNP357_371  | 0.45 | 0.40        | 0.37        | 0.35        |
| SNP377_251  | 0.37 | 0.40        | 0.39        | 0.29        |
| SNP391_170  | 0.12 | <b>0.21</b> | <b>0.06</b> | 0.17        |
| SNP397_331  | 0.13 | <b>0.25</b> | 0.10        | 0.08        |
| SNP415_209  | 0.16 | 0.13        | 0.15        | 0.24        |
| SNP421_234  | 0.13 | <b>0.21</b> | 0.07        | 0.18        |
| SNP425_205  | 0.06 | 0.10        | 0.04        | 0.07        |
| SNP437_129  | 0.19 | <b>0.28</b> | 0.16        | <b>0.07</b> |
| SNP447_244  | 0.45 | <b>0.33</b> | 0.47        | <b>0.28</b> |
| SNP451_287  | 0.35 | 0.32        | 0.34        | 0.38        |
| SNP453_375  | 0.44 | 0.38        | 0.49        | 0.41        |
| SNP457_192  | 0.04 | <b>0.11</b> | 0.03        | 0.01        |
| SNP459_140  | 0.22 | 0.23        | 0.26        | 0.15        |
| SNP463_296  | 0.02 | <b>0.06</b> | 0.01        | 0.01        |
| SNP477_239  | 0.16 | <b>0.41</b> | <b>0.06</b> | <b>0.06</b> |
| SNP497_281  | 0.07 | 0.03        | 0.09        | 0.06        |
| SNP517_224  | 0.39 | 0.38        | <b>0.29</b> | 0.27        |
| SNP533_161  | 0.01 | 0.00        | 0.02        | 0.00        |
| SNP543_268  | 0.10 | 0.05        | 0.12        | <b>0.20</b> |
| SNP551_351  | 0.12 | 0.06        | 0.11        | <b>0.24</b> |
| SNP553_98   | 0.39 | 0.36        | 0.40        | 0.36        |
| SNP555_132  | 0.38 | 0.40        | 0.31        | <b>0.18</b> |
| SNP557_104  | 0.17 | <b>0.08</b> | <b>0.28</b> | 0.09        |
| SNP559_110  | 0.23 | 0.22        | 0.25        | 0.24        |
| SNP561_120  | 0.03 | 0.01        | 0.05        | 0.06        |
| SNP567_341  | 0.21 | 0.24        | 0.18        | <b>0.35</b> |
| SNP571_227  | 0.48 | 0.44        | 0.48        | 0.46        |
| SNP575_128  | 0.14 | 0.11        | 0.13        | <b>0.28</b> |
| SNP579_187  | 0.14 | 0.08        | <b>0.08</b> | <b>0.30</b> |
| SNP581_114  | 0.39 | <b>0.07</b> | <b>0.50</b> | 0.47        |
| SNP591_148  | 0.35 | 0.26        | 0.38        | 0.33        |
| SNP593_149  | 0.39 | 0.35        | 0.46        | 0.28        |
| SNP605_120i | 0.14 | <b>0.03</b> | 0.21        | 0.15        |
| SNP613_315  | 0.33 | <b>0.46</b> | 0.26        | 0.32        |
| SNP625_278  | 0.08 | <b>0.20</b> | <b>0.00</b> | 0.04        |
| SNP635_21   | 0.16 | <b>0.25</b> | 0.13        | <b>0.05</b> |
| SNP649_567  | 0.40 | 0.38        | <b>0.50</b> | 0.32        |
| SNP651_658  | 0.01 | 0.01        | 0.00        | <b>0.05</b> |
| SNP653_90   | 0.30 | <b>0.43</b> | 0.23        | <b>0.16</b> |
| SNP655_93   | 0.16 | <b>0.31</b> | 0.12        | 0.09        |
| SNP659_73   | 0.39 | 0.45        | 0.41        | 0.31        |
| SNP683_120  | 0.05 | 0.01        | 0.07        | 0.04        |
| SNP691_139  | 0.49 | 0.38        | 0.48        | 0.49        |
| SNP697_296  | 0.14 | 0.16        | <b>0.07</b> | <b>0.30</b> |
| SNP699_311  | 0.14 | 0.16        | 0.21        | 0.08        |
| SNP709_258  | 0.25 | 0.18        | 0.26        | <b>0.40</b> |
| SNP715_260  | 0.06 | 0.02        | 0.07        | 0.07        |
| SNP811_42   | 0.28 | 0.34        | 0.22        | 0.28        |
| SNP817_209  | 0.07 | 0.07        | 0.06        | 0.07        |
| SNP819_210  | 0.43 | 0.47        | 0.40        | 0.45        |
| SNP829_281  | 0.48 | 0.35        | 0.49        | 0.48        |
